# Supplementary material for: Continuous Fixed-Bed Column Studies on Congo Red Dye Adsorption-Desorption Using Free and Immobilized Nelumbo nucifera Leaf Adsorbent
Source: MDPI journal article supplement (doi:10.3390/polym14010054), 2021-12-24
Supplement: s1 [file s1]

Article

# Continuous Fixed-Bed Column Studies on Congo Red Dye Adsorption-Desorption Using Free and Immobilized *Nelumbo nucifera* Leaf Adsorbent

Vairavel Parimelazhagan <sup>1\*</sup>, Gautham Jeppu <sup>1</sup> and Nakul Rampal <sup>2</sup>

## Supplementary Materials

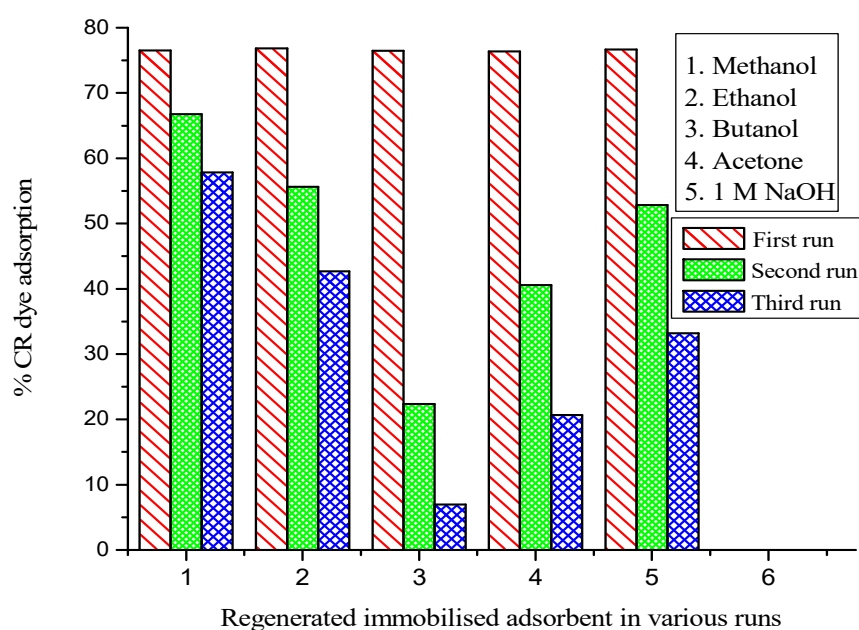

**Figure S1.** Reusability of immobilized NNLP adsorbent for the adsorption of CR dye in various runs. (Initial pH: 6; initial dye concentration: 200 mg L<sup>-1</sup>; volume of dye solution: 100 mL; agitation speed: 150 rpm; temperature: 301 K; contact time: 24 h).

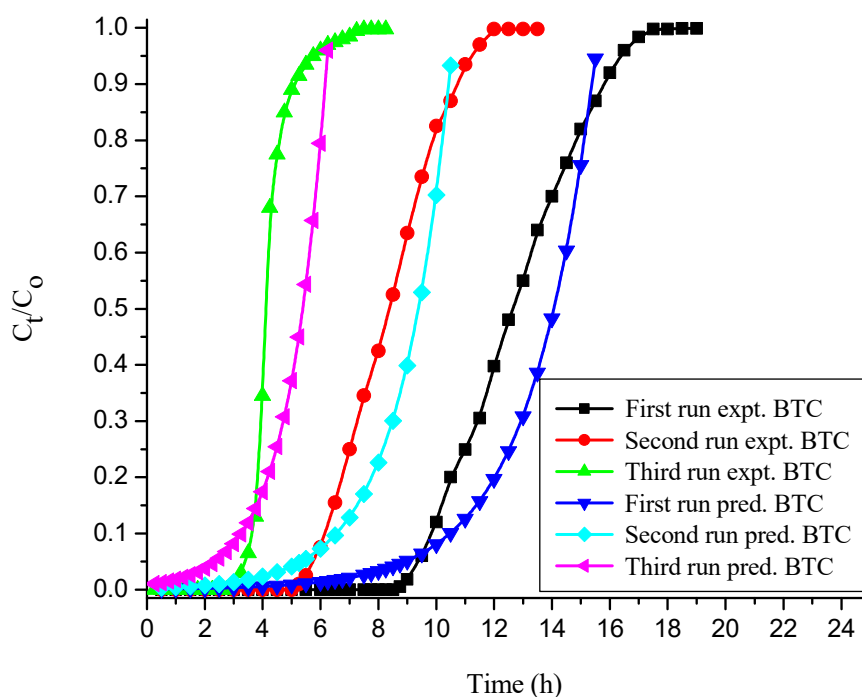

**Figure S2.** BTCs for experimental vs. simulated Adams-Bohart model for the decolorization of CR by free NNLP adsorbent in various runs (Initial pH: 6; flow rate:  $1 \text{ mL min}^{-1}$ ; inlet dye concentration:  $15 \text{ mg L}^{-1}$ ; temperature: 301 K).

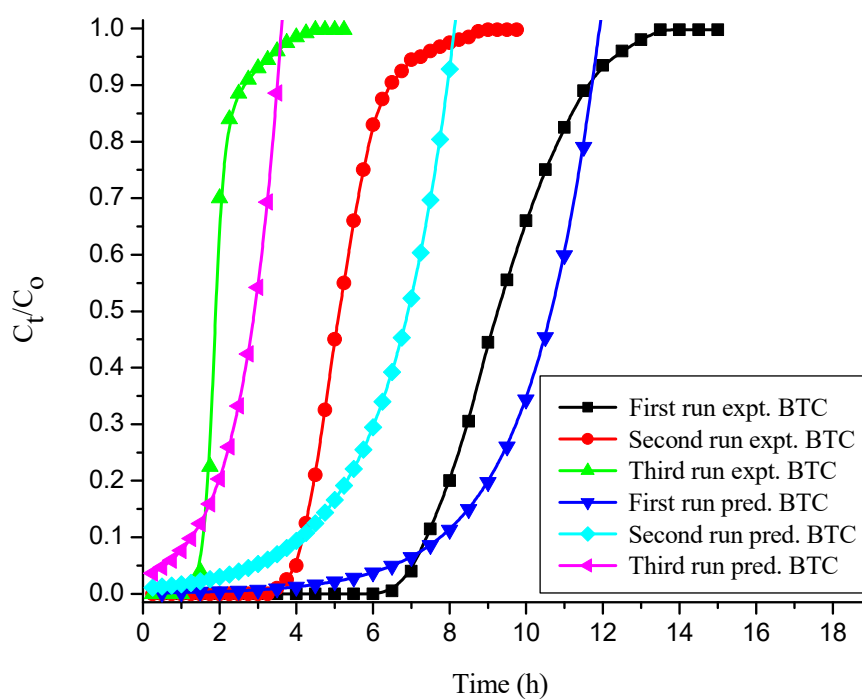

**Figure S3.** BTCs for experimental vs. simulated Adams-Bohart model for the decolorization of CR dye by sodium silicate gel immobilized NNLP adsorbent in various runs (Initial pH: 6; flow rate:  $1 \text{ mL min}^{-1}$ ; inlet dye concentration:  $15 \text{ mg L}^{-1}$ ; temperature: 301 K).

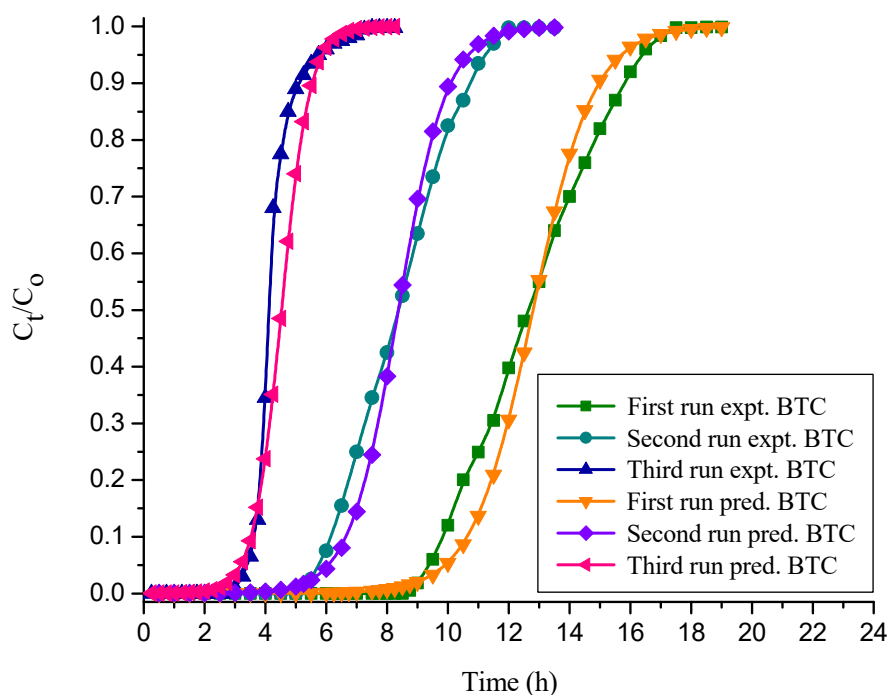

**Figure S4.** BTCs for experimental vs. simulated BDST model for the decolorization of CR by free NNLP adsorbent in various runs (Initial pH: 6; flow rate:  $1 \text{ mL min}^{-1}$ ; inlet dye concentration:  $15 \text{ mg L}^{-1}$ ; temperature: 301 K).

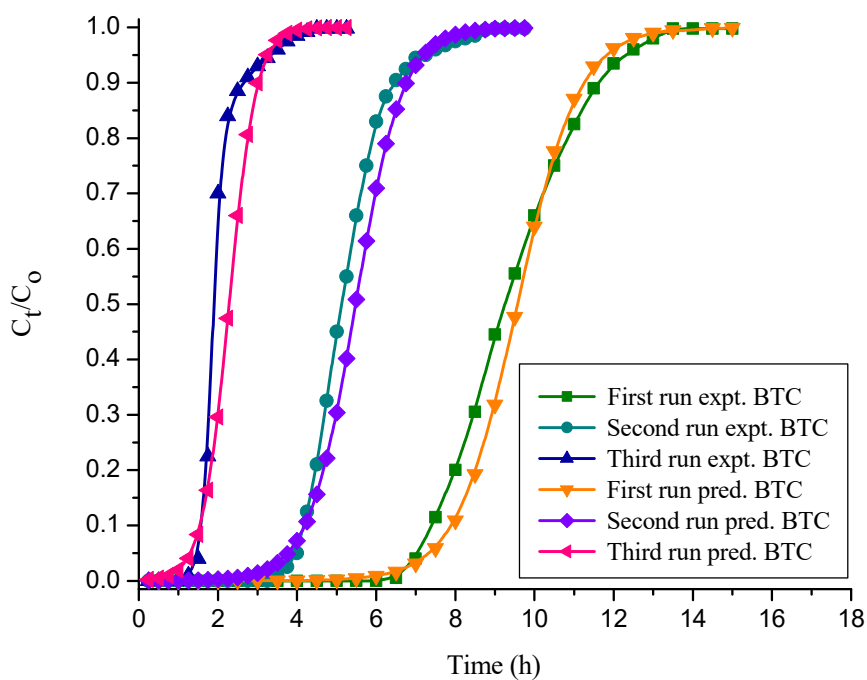

**Figure S5.** BTCs for experimental vs. simulated BDST model for the decolorization of CR dye by sodium silicate gel immobilized NNLP adsorbent in various runs (Initial pH: 6; flow rate:  $1 \text{ mL min}^{-1}$ ; inlet dye concentration:  $15 \text{ mg L}^{-1}$ ; temperature: 301 K).

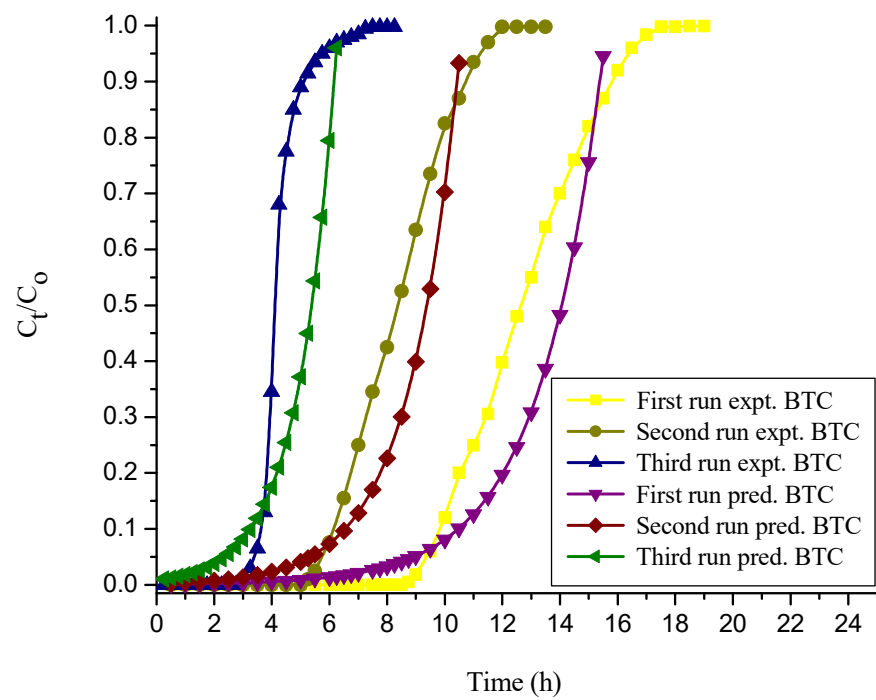

**Figure S6.** BTCs for experimental vs. simulated Wolborska model for the decolorization of CR by free NNLP adsorbent in various runs (Initial pH: 6; flow rate:  $1 \text{ mL min}^{-1}$ ; inlet dye concentration:  $15 \text{ mg L}^{-1}$ ; temperature: 301 K).

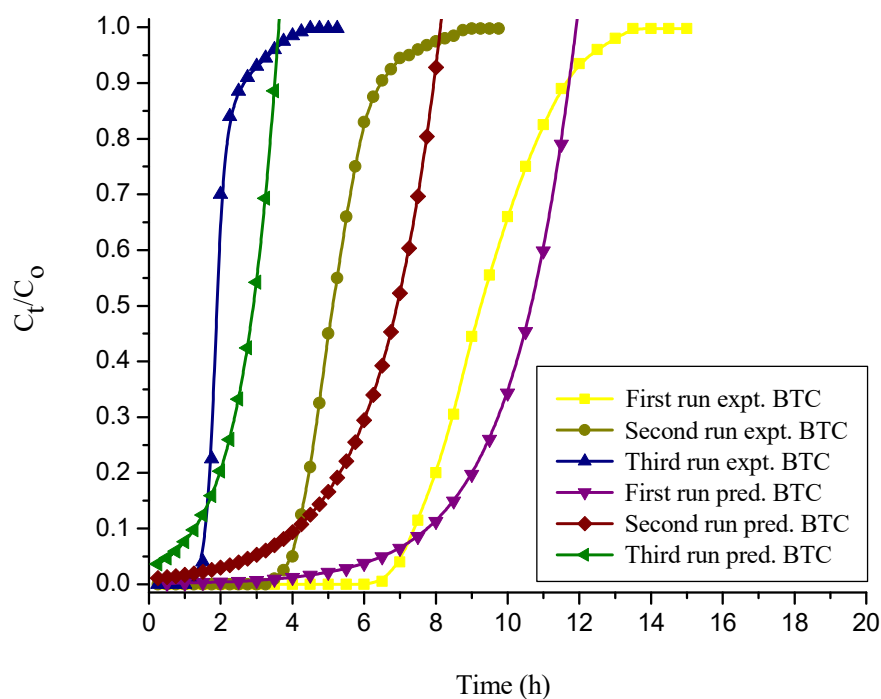

**Figure S7.** BTCs for experimental vs. simulated Wolborska model for the decolorization of CR dye by sodium silicate gel immobilized NNLP adsorbent in various runs (Initial pH:6; flow rate: 1 mL min<sup>-1</sup>; inlet dye concentration: 15 mg L<sup>-1</sup>; temperature: 301 K).

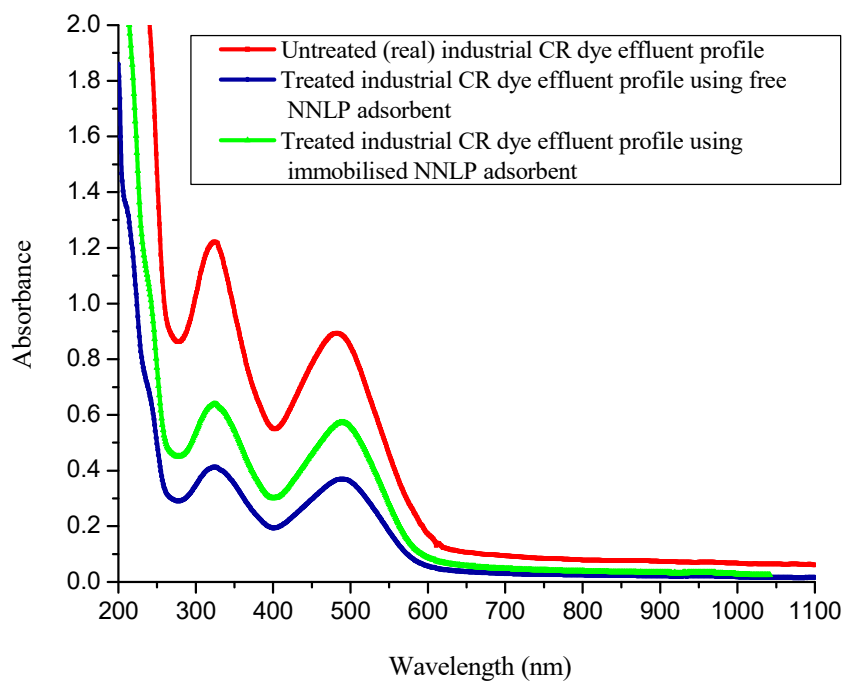

**Figure S8.** Industrial CR dye effluent decolorization profile obtained in column studies using free and immobilized NNLP adsorbents with untreated effluent profile (Initial pH: 6; bed height: 2.5 cm; flow rate: 1 mL min<sup>-1</sup>; inlet adsorbate concentration: 215 mg L<sup>-1</sup>; temperature: 301 K).

**Table S1.** Effect of adsorbent composition in various polymeric matrices for CR dye adsorption (Initial pH:6; initial dye concentration: 250 mg L<sup>-1</sup>; free NNLP adsorbent particle size: 94 µm; immobilized NNLP adsorbent dosage: 6 g L<sup>-1</sup>; agitation speed: 150 rpm; temperature: 301 K; contact time: 24 h).

| NNLP adsorbent loading % (w/v) | % color removal of CR dye in various immobilized polymeric matrices |                   |             |                 |
|--------------------------------|---------------------------------------------------------------------|-------------------|-------------|-----------------|
|                                | Calcium alginate                                                    | Polyvinyl alcohol | Polysulfone | Sodium silicate |
| 1                              | 70.39                                                               | 62.24             | 69.84       | 75.48           |
| 2                              | 71.65                                                               | 65.38             | 72.35       | 80.26           |
| 3                              | 73.47                                                               | 68.54             | 74.16       | 83.64           |
| 4                              | 75.58                                                               | 69.48             | 75.90       | 81.28           |
| 5                              | 76.83                                                               | 67.82             | 77.24       | 78.34           |
| 6                              | 74.92                                                               | 65.16             | 78.56       | 74.12           |
| 7                              | 72.67                                                               | 62.98             | 75.62       | 69.76           |
| 8                              | 70.29                                                               | 60.35             | 71.18       | 65.52           |
| 9                              | 68.04                                                               | 58.08             | 66.45       | 60.34           |
| 10                             | 65.24                                                               | 56.34             | 62.58       | 54.26           |

**Table S2.** Desorption studies for the removal of CR dye from sodium silicate gel immobilized NNLP adsorbent in various runs.

| Sl. No | Desorbing reagent | % desorption of CR dye from NNLP adsorbent |                     |                     |
|--------|-------------------|--------------------------------------------|---------------------|---------------------|
|        |                   | 1 <sup>st</sup> run                        | 2 <sup>nd</sup> run | 3 <sup>rd</sup> run |
| 1      | Methanol          | 72.870                                     | 61.243              | 52.670              |
| 2      | Ethanol           | 63.961                                     | 47.655              | 34.822              |
| 3      | Butanol           | 35.479                                     | 15.836              | 1.548               |
| 4      | Acetone           | 49.660                                     | 33.258              | 11.367              |
| 5      | 1 M NaOH          | 58.148                                     | 43.912              | 25.784              |

**Table S3.** Reusability of sodium silicate gel immobilized NNLP adsorbent for the decolorization of CR dye in various runs.

| Sl. No | Desorbing reagent | % color removal by regenerated immobilized NNLP adsorbent |                     |                     |
|--------|-------------------|-----------------------------------------------------------|---------------------|---------------------|
|        |                   | 1 <sup>st</sup> run                                       | 2 <sup>nd</sup> run | 3 <sup>rd</sup> run |
| 1      | Methanol          | 76.542                                                    | 66.753              | 57.840              |
| 2      | Ethanol           | 76.822                                                    | 55.637              | 42.765              |
| 3      | Butanol           | 76.485                                                    | 22.342              | 6.978               |
| 4      | Acetone           | 76.394                                                    | 40.564              | 20.652              |
| 5      | 1 M NaOH          | 76.652                                                    | 52.845              | 33.184              |
